# Supplementary material for: A haplotype-resolved draft genome of the European sardine (Sardina pilchardus)
Source: PubMed Central journal article supplement (PMC6528745; doi:10.1093/gigascience/giz059), 2019-05-21
Supplement: giz059_giga-d-18-00377_original_submission.pdf [file giz059_giga-d-18-00377_original_submission.pdf]

## A haplotype-resolved draft genome of the European sardine (*Sardina Pilchardus*) --Manuscript Draft--

|                                                      |                                                                                                                                                                                                                                                                                                                                                                                                                                                                                                                                                                                                                                                                                                                                                                                                                                                                                                                                                                                                                                                                                                                                                                                                                                                                                                                                                                                                                                                                                                                                                                                                                                                                                                                            |                |
|------------------------------------------------------|----------------------------------------------------------------------------------------------------------------------------------------------------------------------------------------------------------------------------------------------------------------------------------------------------------------------------------------------------------------------------------------------------------------------------------------------------------------------------------------------------------------------------------------------------------------------------------------------------------------------------------------------------------------------------------------------------------------------------------------------------------------------------------------------------------------------------------------------------------------------------------------------------------------------------------------------------------------------------------------------------------------------------------------------------------------------------------------------------------------------------------------------------------------------------------------------------------------------------------------------------------------------------------------------------------------------------------------------------------------------------------------------------------------------------------------------------------------------------------------------------------------------------------------------------------------------------------------------------------------------------------------------------------------------------------------------------------------------------|----------------|
| <b>Manuscript Number:</b>                            | GIGA-D-18-00377                                                                                                                                                                                                                                                                                                                                                                                                                                                                                                                                                                                                                                                                                                                                                                                                                                                                                                                                                                                                                                                                                                                                                                                                                                                                                                                                                                                                                                                                                                                                                                                                                                                                                                            |                |
| <b>Full Title:</b>                                   | A haplotype-resolved draft genome of the European sardine ( <i>Sardina Pilchardus</i> )                                                                                                                                                                                                                                                                                                                                                                                                                                                                                                                                                                                                                                                                                                                                                                                                                                                                                                                                                                                                                                                                                                                                                                                                                                                                                                                                                                                                                                                                                                                                                                                                                                    |                |
| <b>Article Type:</b>                                 | Data Note                                                                                                                                                                                                                                                                                                                                                                                                                                                                                                                                                                                                                                                                                                                                                                                                                                                                                                                                                                                                                                                                                                                                                                                                                                                                                                                                                                                                                                                                                                                                                                                                                                                                                                                  |                |
| <b>Funding Information:</b>                          | H2020 Research Infrastructures (654008)                                                                                                                                                                                                                                                                                                                                                                                                                                                                                                                                                                                                                                                                                                                                                                                                                                                                                                                                                                                                                                                                                                                                                                                                                                                                                                                                                                                                                                                                                                                                                                                                                                                                                    | Not applicable |
|                                                      | Fundação para a Ciência e a Tecnologia (UID/Multi/04326/2013)                                                                                                                                                                                                                                                                                                                                                                                                                                                                                                                                                                                                                                                                                                                                                                                                                                                                                                                                                                                                                                                                                                                                                                                                                                                                                                                                                                                                                                                                                                                                                                                                                                                              | Not applicable |
|                                                      | Fundação para a Ciência e a Tecnologia (22153-01/SAICT/2016)                                                                                                                                                                                                                                                                                                                                                                                                                                                                                                                                                                                                                                                                                                                                                                                                                                                                                                                                                                                                                                                                                                                                                                                                                                                                                                                                                                                                                                                                                                                                                                                                                                                               | Not applicable |
| <b>Abstract:</b>                                     | <p><b>Background</b></p> <p>The European sardine (<i>Sardina pilchardus</i> Walbaum, 1792) has a high cultural and economic importance throughout its distribution. Monitoring studies of the sardine populations report an alarming decrease in stocks due to overfishing and environmental change. There is an urgent need to better understand the causal factors of this continuous decrease in the sardine stock, which has recorded a low historical level in the Iberian Atlantic coast. Important biological and ecological features such as levels of population diversity, structure, and migratory patterns can be addressed with the development and use of genomics resources.</p> <p><b>Findings</b></p> <p>The sardine genome of a single female individual was sequenced using Illumina HiSeq X Ten 10X Genomics linked-reads generating 113.8Gb of sequencing data. Two haploid and a consensus draft genomes were assembled, with a total size of 935 Mbp (N50 103 Kb) and 950Mbp (N50 97 Kb), respectively. The genome completeness assessment captured 84% of Actinopterygii Benchmarking Universal Single-Copy Orthologs. To obtain a more complete analysis the transcriptomes of eleven tissues were sequenced and used to aid the functional annotation of the genome resulting in 29,408 genes predicted. Variant calling on nearly half of the haplotype genome resulted in the identification of more than 2.3 million phased SNPs with heterozygous loci.</p> <p><b>Conclusions</b></p> <p>The sardine genome is a cornerstone for future population genomics studies, the results of which may be integrated into future sardine stock modelling to better manage this valuable resource.</p> |                |
| <b>Corresponding Author:</b>                         | Adelino V. M. Canário                                                                                                                                                                                                                                                                                                                                                                                                                                                                                                                                                                                                                                                                                                                                                                                                                                                                                                                                                                                                                                                                                                                                                                                                                                                                                                                                                                                                                                                                                                                                                                                                                                                                                                      |                |
|                                                      | PORTUGAL                                                                                                                                                                                                                                                                                                                                                                                                                                                                                                                                                                                                                                                                                                                                                                                                                                                                                                                                                                                                                                                                                                                                                                                                                                                                                                                                                                                                                                                                                                                                                                                                                                                                                                                   |                |
| <b>Corresponding Author Secondary Information:</b>   |                                                                                                                                                                                                                                                                                                                                                                                                                                                                                                                                                                                                                                                                                                                                                                                                                                                                                                                                                                                                                                                                                                                                                                                                                                                                                                                                                                                                                                                                                                                                                                                                                                                                                                                            |                |
| <b>Corresponding Author's Institution:</b>           |                                                                                                                                                                                                                                                                                                                                                                                                                                                                                                                                                                                                                                                                                                                                                                                                                                                                                                                                                                                                                                                                                                                                                                                                                                                                                                                                                                                                                                                                                                                                                                                                                                                                                                                            |                |
| <b>Corresponding Author's Secondary Institution:</b> |                                                                                                                                                                                                                                                                                                                                                                                                                                                                                                                                                                                                                                                                                                                                                                                                                                                                                                                                                                                                                                                                                                                                                                                                                                                                                                                                                                                                                                                                                                                                                                                                                                                                                                                            |                |
| <b>First Author:</b>                                 | Bruno Louro, PhD                                                                                                                                                                                                                                                                                                                                                                                                                                                                                                                                                                                                                                                                                                                                                                                                                                                                                                                                                                                                                                                                                                                                                                                                                                                                                                                                                                                                                                                                                                                                                                                                                                                                                                           |                |
| <b>First Author Secondary Information:</b>           |                                                                                                                                                                                                                                                                                                                                                                                                                                                                                                                                                                                                                                                                                                                                                                                                                                                                                                                                                                                                                                                                                                                                                                                                                                                                                                                                                                                                                                                                                                                                                                                                                                                                                                                            |                |
| <b>Order of Authors:</b>                             | Bruno Louro, PhD                                                                                                                                                                                                                                                                                                                                                                                                                                                                                                                                                                                                                                                                                                                                                                                                                                                                                                                                                                                                                                                                                                                                                                                                                                                                                                                                                                                                                                                                                                                                                                                                                                                                                                           |                |
|                                                      | Gianluca De Moro, PhD                                                                                                                                                                                                                                                                                                                                                                                                                                                                                                                                                                                                                                                                                                                                                                                                                                                                                                                                                                                                                                                                                                                                                                                                                                                                                                                                                                                                                                                                                                                                                                                                                                                                                                      |                |
|                                                      | Carlos Garcia                                                                                                                                                                                                                                                                                                                                                                                                                                                                                                                                                                                                                                                                                                                                                                                                                                                                                                                                                                                                                                                                                                                                                                                                                                                                                                                                                                                                                                                                                                                                                                                                                                                                                                              |                |

|                                                                                                                                                                                                                                                                                                                                                                                                                                                                                                                                     |                            |
|-------------------------------------------------------------------------------------------------------------------------------------------------------------------------------------------------------------------------------------------------------------------------------------------------------------------------------------------------------------------------------------------------------------------------------------------------------------------------------------------------------------------------------------|----------------------------|
|                                                                                                                                                                                                                                                                                                                                                                                                                                                                                                                                     | Cymon J. Cox, PhD          |
|                                                                                                                                                                                                                                                                                                                                                                                                                                                                                                                                     | Ana Veríssimo              |
|                                                                                                                                                                                                                                                                                                                                                                                                                                                                                                                                     | Stephen J. Sabatino        |
|                                                                                                                                                                                                                                                                                                                                                                                                                                                                                                                                     | António M. Santos          |
|                                                                                                                                                                                                                                                                                                                                                                                                                                                                                                                                     | Adelino V. M. Canário, PhD |
| <b>Order of Authors Secondary Information:</b>                                                                                                                                                                                                                                                                                                                                                                                                                                                                                      |                            |
| <b>Additional Information:</b>                                                                                                                                                                                                                                                                                                                                                                                                                                                                                                      |                            |
| <b>Question</b>                                                                                                                                                                                                                                                                                                                                                                                                                                                                                                                     | <b>Response</b>            |
| Are you submitting this manuscript to a special series or article collection?                                                                                                                                                                                                                                                                                                                                                                                                                                                       | No                         |
| <p><b>Experimental design and statistics</b></p> <p>Full details of the experimental design and statistical methods used should be given in the Methods section, as detailed in our <a href="#">Minimum Standards Reporting Checklist</a>. Information essential to interpreting the data presented should be made available in the figure legends.</p> <p>Have you included all the information requested in your manuscript?</p>                                                                                                  | Yes                        |
| <p><b>Resources</b></p> <p>A description of all resources used, including antibodies, cell lines, animals and software tools, with enough information to allow them to be uniquely identified, should be included in the Methods section. Authors are strongly encouraged to cite <a href="#">Research Resource Identifiers</a> (RRIDs) for antibodies, model organisms and tools, where possible.</p> <p>Have you included the information requested as detailed in our <a href="#">Minimum Standards Reporting Checklist</a>?</p> | Yes                        |
| <p><b>Availability of data and materials</b></p> <p>All datasets and code on which the conclusions of the paper rely must be</p>                                                                                                                                                                                                                                                                                                                                                                                                    | Yes                        |

either included in your submission or deposited in [publicly available repositories](#) (where available and ethically appropriate), referencing such data using a unique identifier in the references and in the “Availability of Data and Materials” section of your manuscript.

Have you have met the above requirement as detailed in our [Minimum Standards Reporting Checklist](#)?

1 1 A haplotype-resolved draft genome of the European sardine (*Sardina*  
2  
3  
4 2 *Pilchardus*)  
5  
6

7 3 Bruno Louro<sup>1\*</sup>; Gianluca De Moro<sup>1\*</sup>; Carlos Garcia<sup>1</sup>; Cymon J. Cox<sup>1</sup>; Ana Veríssimo<sup>2</sup>;  
8  
9 4 Stephen J. Sabatino<sup>2</sup>; António M. Santos<sup>2</sup>; Adelino V. M. Canário<sup>1&</sup>  
10

11 5 1 CCMAR Centre of Marine Sciences, University of Algarve, Campus de Gambelas,  
12  
13 6 8005-139 Faro, Portugal.  
14

15  
16 7 2 CIBIO, Centro de Investigação em Biodiversidade e Recursos Genéticos, InBIO,  
17  
18 8 Laboratório Associado, Universidade do Porto, Vairão, Portugal  
19

20  
21  
22 9

23  
24 10 \* authors contributed equally  
25

26 11 & Corresponding author: Adelino V. M. Canário, e-mail: acanario@ualg.pt  
27  
28

29 12  
30  
31

32  
33 13 **Abstract**  
34  
35

36  
37 14 **Background:** The European sardine (*Sardina pilchardus* Walbaum, 1792) has a high  
38  
39 15 cultural and economic importance throughout its distribution. Monitoring studies of the  
40  
41 16 sardine populations report an alarming decrease in stocks due to overfishing and  
42  
43 17 environmental change. There is an urgent need to better understand the causal factors  
44  
45 18 of this continuous decrease in the sardine stock, which has recorded a low historical  
46  
47 19 level in the Iberian Atlantic coast. Important biological and ecological features such as  
48  
49 20 levels of population diversity, structure, and migratory patterns can be addressed with  
50  
51 21 the development and use of genomics resources. **Findings:** The sardine genome of  
52  
53 22 a single female individual was sequenced using Illumina HiSeq X Ten 10X Genomics  
54  
55 23 linked-reads generating 113.8Gb of sequencing data. Two haploid and a consensus  
56  
57  
58  
59  
60  
61  
62  
63  
64  
65

1  
2  
3  
4  
5  
6  
7  
8  
9  
10  
11  
12  
13  
14  
15  
16  
17  
18  
19  
20  
21  
22  
23  
24  
25  
26  
27  
28  
29  
30  
31  
32  
33  
34  
35  
36  
37  
38  
39  
40  
41  
42  
43  
44  
45  
46  
47  
48  
49  
50  
51  
52  
53  
54  
55  
56  
57  
58  
59  
60  
61  
62  
63  
64  
65

draft genomes were assembled, with a total size of 935 Mbp (N50 103 Kb) and 950Mbp (N50 97 Kb), respectively. The genome completeness assessment captured 84% of Actinopterygii Benchmarking Universal Single-Copy Orthologs. To obtain a more complete analysis the transcriptomes of eleven tissues were sequenced and used to aid the functional annotation of the genome resulting in 29,408 genes predicted. Variant calling on nearly half of the haplotype genome resulted in the identification of more than 2.3 million phased SNPs with heterozygous loci.

**Conclusions:** The sardine genome is a cornerstone for future population genomics studies, the results of which may be integrated into future sardine stock modelling to better manage this valuable resource.

**Keywords:** European sardine; *Sardina*; genome; transcriptome; haplotype; SNP

## Data description

### Background

The European sardine (*Sardina pilchardus* Walbaum, 1792) (Figure 1) is a small pelagic fish occurring in temperate boundary currents of the Northeast Atlantic down to Cape Verde off the west coast of Africa, and throughout the Mediterranean to the Black Sea. Two subspecies are generally recognised: *Sardina pilchardus pilchardus* occupies the north-eastern Atlantic and the North Sea whereas *S. pilchardus sardina* occupies the Mediterranean and Black seas, and the North African coasts south to Cape Verde, with a contact zone near the Strait of Gibraltar [1, 2]. As with other members of the Clupeidae family (e.g. herring, *Clupea harengus*, Allis shad, *Alosa*

1  
2  
3  
4  
5  
6  
7  
8  
9  
10  
11  
12  
13  
14  
15  
16  
17  
18  
19  
20  
21  
22  
23  
24  
25  
26  
27  
28  
29  
30  
31  
32  
33  
34  
35  
36  
37  
38  
39  
40  
41  
42  
43  
44  
45  
46  
47  
48  
49  
50  
51  
52  
53  
54  
55  
56  
57  
58  
59  
60  
61  
62  
63  
64  
65

46 *alosa*) [3], the sardine experiences strong population fluctuations, possibly reflecting  
47 environmental fluctuations, including climate change [4, 5].

48 The sardine is of major economic and social importance throughout its range with a  
49 reported commercial catch for 2016 of 72,183 tonnes in European waters. Indeed, in  
50 a country such as Portugal the sardine is an iconic and culturally revered fish which  
51 plays a central role in touristic events such as summer festivals throughout the country.  
52 However, recent fisheries data strongly suggests the Portuguese sardine fisheries are  
53 under threat. A recent report the International Council for the Exploration of the Sea  
54 [6] noted sharp decreases in the Iberian Atlantic coast sardine stock that resulted in  
55 ICES advice that catches in 2017 should be no more than 23,000 tonnes. The sardine  
56 fishery biomass has suffered from a declining trend of annual recruitment between  
57 1978 and 2006 and more recently it fluctuates around historically low values, with a  
58 high risk of collapse of the Iberian Atlantic stocks [6].

59 A number of sardine stocks have been identified by morphometric methods, including  
60 as many as five stocks in the north-eastern Atlantic (including the Azores), two off the  
61 Moroccan coast, and one in Senegalese waters [1, 7]. Each of these recognized  
62 sardine stocks is subjected to specific climatic and oceanic conditions, mainly during  
63 larval development and recruitment, which directly influence the recruitment of the  
64 sardine fisheries in the short term [4, 8, 9]. However, because of phenotypic plasticity,  
65 morphological traits are strongly influenced by environmental conditions and the  
66 underlying genetics that define those stocks has proven elusive [10]. While the  
67 recognition of subspecies and localised stocks might indicate significant genetic  
68 structuring of the population, the large population sizes and extensive migration of  
69 sardines are likely to increase gene flow and reduce differences among stocks,

1 70 suggesting, at its most extensive, a panmictic population with little genetic  
2 71 differentiation within the species' range [11].  
3

4 72 It is now generally well established that to fully understand the genetic basis of  
5 73 evolutionarily and ecologically significant traits, the gene and regulatory element  
6  
7 74 composition at the genomic level needs to be assessed [see e.g., 12, 13]. Therefore,  
8  
9 75 here we provide a European sardine draft genome to serve as a tool for conservation  
10  
11 76 and fisheries management, providing the essential context to assess the genetic  
12  
13 77 structure of the sardine population(s) and for baseline studies of the genetic basis of  
14  
15 78 the life-history and ecological traits of this small pelagic.  
16  
17  
18  
19  
20  
21  
22

## 23 79 Genome sequencing

24  
25  
26 80 Sardines were caught during commercial operations in the coastal waters off Olhão,  
27  
28 81 Portugal, and maintained live at the experimental fish culture facilities (EPPO) of the  
29  
30 82 Portuguese Institute for the Sea and Atmosphere (IPMA) in Olhão, Portugal [14]. A  
31  
32 83 single adult female was anesthetised with 2-phenoxyethanol (1:250 v/v), blood  
33  
34 84 sampled with a heparinized syringe, and euthanized by cervical section. Eleven  
35  
36 85 tissues were dissected out - gill plus branchial arch, liver, spleen, female gonad,  
37  
38 86 midgut, white muscle, red muscle, kidney, head kidney, brain plus pituitary and caudal  
39  
40 87 fin (including skin, scales, bone and cartilage) – into RNA $later$  (Sigma-Aldrich, USA)  
41  
42 88 at room temperature followed by storage at  $-20^{\circ}\text{C}$ . The tissue sampling was carried  
43  
44 89 out in accordance with the Guidelines of the European Union Council (86/609/EU) and  
45  
46 90 Portuguese legislation for the use of laboratory animals, under licence (Permit number  
47  
48 91 010238 from 19/04/2016) from the Veterinary Medicines Directorate (DGAV), the  
49  
50 92 Portuguese competent authority for the protection of animals, Ministry of Agriculture,  
51  
52  
53  
54  
55 93 Rural Development and Fisheries, Portugal.  
56  
57  
58  
59  
60  
61  
62  
63  
64  
65

1 94 Total RNA was extracted using a total RNA purification kit (Maxwell® 16 Total RNA  
2 95 Purification Kit, Promega) and digested twice with DNase (DNA-free kit, Ambion, UK).  
3  
4 96 The total RNA samples were kept at -80°C until shipment to the RNAseq service  
5  
6  
7 97 provider Admera Health Co. (USA) which confirmed a RIN above 8 (Qubit TapeStation)  
8  
9 98 upon arrival. The mRNA library preparation was performed with NEBNext® Poly(A)  
10  
11 99 mRNA Magnetic Isolation Module kit and NEBNext® Ultra™ Directional RNA Library  
12  
13  
14 100 Prep kit for posterior sequencing using Illumina HiSeq 4000 paired-end 150 bp cycle  
15  
16  
17 101 to generate about 596 million paired-end reads in total.

18  
19 102 The genomic DNA (gDNA) was isolated from 20 µl of fresh blood using the DNeasy  
20  
21 103 blood and tissue kit (Qiagen), followed by RNase treatment according to the  
22  
23  
24 104 manufacturer's protocol. The integrity of the gDNA was confirmed using pulsed-field  
25  
26 105 gel electrophoresis and showed a molecular weight largely above 50 kbp. The gDNA  
27  
28  
29 106 was stored at -20 °C before shipping to the service provider (genome.one,  
30  
31 107 Darlinghurst, Australia). Microfluidic partitioned gDNA libraries using the 10x  
32  
33  
34 108 Genomics Chromium System were made using 0.6 ng of gDNA input. Sequencing  
35  
36 109 (150bp paired-end cycle) was performed in a single lane of the Illumina HiSeq X Ten  
37  
38  
39 110 instrument (Illumina, San Diego, CA, USA). Chromium library size range (580-850 bp)  
40  
41 111 was determined with LabChip GX Touch (PerkinElmer) and library yield (6.5-40 µM)  
42  
43  
44 112 by quantitative polymerase chain reaction.

## 45 46 47 113 Genome size estimation

48  
49  
50 114 Seven hundred and fifty nine million paired-end reads were generated representing  
51  
52 115 113.8 Gb nucleotide sequences with 76.1% bases  $\geq$  Q30. Raw reads were edited to  
53  
54  
55 116 trim 10X Genomics proprietary barcodes with a python script "filter\_10xReads.py" [15]  
56  
57  
58 117 prior to kmer counting with Jellyfish v2.2.10 [16]. Six hundred and seventy million  
59  
60  
61  
62  
63  
64  
65



118 edited reads (90.5 Gb) were used to obtain the frequency distribution of 23-mers. The  
119 histogram of the kmer counting distribution was plotted in GenomeScope [17] (Figure  
120 2) with maximum kmer coverage of 10,000 for estimation of genome size,  
121 heterozygosity and repeat content. The estimated sardine haploid genome size was  
122 907Mbp with a repeat content of 40.7% and a heterozygosity level of 1.43%  
123 represented in the first peak of the distribution. These high levels of heterozygosity  
124 and repeat content indicated a troublesome genome characteristic of *de novo*  
125 assembly.

### 126 *De novo* genome assembly

127 The de-novo genome assembly was done using the paired-end sequence reads from  
128 the partitioned library as input for the Supernova assembly algorithm (version  
129 2.0.0(7fba7b4), 10x Genomics, San Francisco, CA, USA) [18] to output two haplotype-  
130 resolved genomes with phased scaffolds using the Supernova mkoutput pseudohap  
131 option. For the assembly process the Supernova run parameters for maximum reads  
132 (--maxreads) and barcode fraction (--barfrac) were set for 650M input reads and 80%  
133 of barcodes, respectively. Preliminary trials defined an optimal raw coverage of 78-  
134 fold, above the 56-fold suggested in the Supernova protocol; this allowed tackling (to  
135 some extent) the complexity of the high repeat content nature of the genome in the  
136 assembly (Table 1). Of the defined raw reads maximum input, a fraction of 607.36  
137 million read pairs were used after a quality editing step embedded in the Supernova  
138 pipeline to remove reads that were not barcoded, not properly paired or low-quality  
139 reads. Input reads had a 138.5 bp mean length after proprietary 10X barcode trimming  
140 and a N50 of 612 per barcode/DNA molecule (Table 1).

141 Further scaffolding and gap closure procedures were performed with Rails  
1  
2 142 v1.2/Cobbler v0.3 pipeline script [19] to obtain the final consensus genome sequence  
3  
4  
5 143 using the parameters anchoring sequence length (*-d* 100) and minimum sequence  
6  
7 144 identity (*-i* 0.95). Three scaffolding and gap procedures were performed iteratively with  
8  
9  
10 145 one haplotype of the initial assembly as the assembly *per se*, and previous *de novo*  
11  
12 146 assemblies from Supernova (version 1.2.2), (315M/100% and 450M/80%  
13  
14  
15 147 reads/barcodes). By closing several gaps within scaffolds and merging other scaffolds  
16  
17 148 into longer and fewer scaffolds (117,259), this procedure resulted into a slightly longer  
18  
19 149 genome size of 949.62 Mb, which deflated slightly the scaffold N50 length to 96.6 Kb  
20  
21  
22 150 (Table 2).

24 151 The genome completeness assessment was estimated with Busco v3.0.1 [20].  
25  
26  
27 152 About 83.7% and 91.8% of the genome had significant matches against the  
28  
29 153 actinopterygii and eukaryota odb9 databases, respectively. The actinopterygii.odb9  
30  
31  
32 154 contains 4584 orthologs from 20 different species, and the eukaryota.odb9 contains  
33  
34 155 303 orthologs from sixty-five eukaryotic organisms.  
35  
36  
37 156 The EMBRIC configurator service [21] was used to create a finfish checklist for the  
38  
39 157 submission of the sardine genome project to the European Nucleotide Archive (ENA)  
40  
41 158 (project accession PRJEB27990).

## 45 159 Repeat Content

48 160 The Spil assembly was used as a reference genome to build a *de novo* repeat library  
49  
50  
51 161 running RepeatModeler v1.0.11 [22] with default parameters. The model obtained from  
52  
53 162 RepeatModeler was used, together with Dfam\_consensus database v. 20171107 [23]  
54  
55  
56 163 and RepBase RepeatMasker Edition library v. 20170127 [24] to identify repetitive  
57  
58 164 elements and low complexity sequences running RepeatMasker (v. 4.0.7) [25]. The  
59  
60  
61  
62  
63  
64  
65

165 analysis carried out revealed that 23.33% of the assembled genome harbours at least  
166 one repeat.

## 167 Genome annotation

168 The RNA-seq assembly, repetitive elements, protein homology and *ab initio* gene  
169 prediction were used in a custom annotation pipeline based on multiple runs of Maker  
170 v. 2.31.10 [26]. The final high quality gene models were obtained using a *de novo*  
171 trained set from SNAP v. 2006-07-28 [27], Augustus v. 3.3 [28] and the self-training  
172 software GeneMark v. 4.32 [29]. The trained file for SNAP was generated using the  
173 output of the first run of Maker and the Augustus run was trained using the specific  
174 option in Busco v3.0.1 [20]. The pipeline identified 29,408 genes.

175 Interproscan v. 5.30 [30] and NCBI blastp v. 2.6 [31] were used to functionally annotate  
176 the 30,169 predicted protein coding genes. Thirteen thousand five hundred and fifty  
177 nine (44.9%) proteins were successfully annotated using blastp (e-value 1e-05)  
178 against the SwissProt database [32] and another 2,499 were annotated using the  
179 NCBI non-redundant protein database (NR). In addition to the above, 17,132 (56.8%)  
180 proteins were successfully annotated running interproscan with all the interpro v. 69.0  
181 [33] databases (CDD, CATH-Gene3D, Hamap, PANTHER, Pfam, PIRSF, PRINTS,  
182 ProDom, ProSite Patterns, ProSite Profiles, SFLD, SMART, SUPERFAMILY,  
183 TIGRFAM). In total, 17,199 (65%) of the predicted proteins received a functional  
184 annotation. The annotated genome assembly is published [34] in the wiki-style  
185 annotation portal ORCAE [35].

## 186 Variant calling between phased alleles

187 FASTQ files were processed using 10x Genomics LongRanger v2.2.2 pipeline [36],  
188 defining as reference genome the longest one thousand scaffolds of the

189 Spil\_haplotype1 genome from the Supernova assembly, which represents about  
190 half of the genome (488.5Mb). The LongRanger pipeline was run with default setting  
191 beside the vcmode defining gatk v4.0.3.0 as the variant caller and the somatic  
192 parameters. The longest phase block was 2.86 Mb and the N50 phase block was  
193 0.476 Mb.

194 Single nucleotide polymorphisms (SNP's) were furthered filtered to obtain  
195 only phased and heterozygous SNP's between the two alleles with a coverage higher  
196 than 10-fold using vcftools. A VCF file was obtained containing 2,369,617 filtered  
197 SNPs (Additional file 1), in concordance with the estimated mean distance between  
198 heterozygous SNPs in the whole genome of 197 bp, by the Supernova input report.

### 199 *De novo* transcriptome assembly

200 Editing the 596 million paired-end raw reads for contamination (e.g. adapters) was  
201 done with the Trim Galore wrapper tool [37], low-quality base trimming with Cutadapt  
202 [38] and the output overall quality reports of the edited reads with FastQC [39].

203 The 553.2 million edited paired-end reads were *de novo* assembled using Trinity  
204 v2.5.1 [40] with a minimum contig length of 200 bp, 50x coverage read depth  
205 normalization, and RF strand-specific read orientation. The same parameters were  
206 used for each of the tissue specific *de novo* assemblies. The genome and  
207 transcriptome assemblies were conducted on the National Distributed Computing  
208 Infrastructure [41].

209 The twelve *de novo* transcriptome assemblies (Table 3) were quality assessed  
210 with TransRate v1.0.3 [42] for assembly optimization, including 11 tissue-specific  
211 assemblies and a multi-tissue assembly. The multi-tissue assembly with all reads  
212 resulted in an assembled transcriptome of 170,478 transcript contigs following the

1  
2  
3  
4  
5  
6  
7  
8  
9  
10  
11  
12  
13  
14  
15  
16  
17  
18  
19  
20  
21  
22  
23  
24  
25  
26  
27  
28  
29  
30  
31  
32  
33  
34  
35  
36  
37  
38  
39  
40  
41  
42  
43  
44  
45  
46  
47  
48  
49  
50  
51  
52  
53  
54  
55  
56  
57  
58  
59  
60  
61  
62  
63  
64  
65

213 TransRate step. Functional annotation was performed using the Trinotate pipeline [43]  
214 and integrated into a SQLite database. All annotation was based on the best deduced  
215 open reading frame (ORF) obtained with the Transdecoder v1.03 [44]. Of the 170,478  
216 transcripts contigs, 27,078 (16%) were inferred to ORF protein sequences. Query of  
217 SwissProt (e-value cutoff of 1e-5) via blastx of total contigs resulted in 43,458 (26%)  
218 annotated transcripts. The ORFs were queried against SwissProt (e-value cutoff of  
219 1e-5) via blastp and PFAM via HMMER v3.1b2 hmmscan [45] resulting in 19,705 (73%  
220 of ORF) and 16,538 (61% of ORF) SwissProt and PFAM annotated contigs  
221 respectively. The full annotation report with further functional annotation, such as  
222 signal peptides, transmembrane regions, eggnoG, Kyoto Encyclopedia of Genes and  
223 Genomes (KEGG), and Gene Ontology annotation are listed in tabular format in  
224 Additional file 2.

## 31 225 **Conclusion**

34 226 The genomic and transcriptomic resources here reported are important tools for future  
35 227 studies to understand sardine response at the levels of physiology, population and  
36 228 ecology of the causal factors responsible for the recruitment and collapse of the  
37 229 sardine stock in Iberian Atlantic coast. Besides the commercial interest, the sardine  
38 230 has a key trophic level bridging energy from the primary producers to the top predators  
39 231 in the marine ecosystem, and thus disruption of the population equilibrium is likely to  
40 232 reverberate throughout the food chain.

41 233 Despite an initial assessment of the sardine genome characteristics indicating a high  
42 234 level of repeats and heterozygosity, which poses a challenge to *de novo* genome  
43 235 assembly, a reasonable draft genome was obtained with the 10X Genomics linked-  
44 236 reads technology. The ability to tag and cluster the reads to individual DNA molecules

237 has proven to have similar advantages for scaffolding, as long reads technologies  
1  
2 238 such as Nanopore and Pacific Biosciences, but with the advantage of high coverage  
3  
4  
5 239 and low error rates. The advantage for *de novo* genomic assemblies is evident in  
6  
7 240 comparison to simple short read data, especially in the case of wild species with highly  
8  
9  
10 241 heterozygous genomes, resulting in many genomic regions uncaptured and with lower  
11  
12 242 scaffolding yield due to repeated content.

14 243         The high heterozygosity identified here hints future problems in monitoring  
16  
17 244 sardine populations using low resolution genetic data. However, the phased SNPs  
18  
19 245 obtained in this study can be used to initiate the development of a SNP genetic panel  
20  
21  
22 246 for population monitoring, with SNPs representative of haplotype blocks, allowing  
23  
24 247 insights into the patterns of linkage disequilibrium and the structure of haplotype blocks  
25  
26  
27 248 across populations.

## 30 31 249 **Availability of the supporting data**

32  
33  
34 250 Raw data, assembled transcriptomes, and assembled genomes are available at the  
35  
36  
37 251 European Bioinformatics Institute ENA archive with the project accession  
38  
39 252 PRJEB27990. The annotated genome assembly is published in the wiki-style  
40  
41  
42 253 annotation portal ORCAE [34].

## 45 46 254 **Acknowledgements**

47  
48  
49 255 This research was supported by national funds from FCT - Foundation for Science  
50  
51  
52 256 and Technology through project UID/Multi/04326/2013 and received support of the  
53  
54 257 INCD funded by FCT and FEDER under project 22153-01/SAICT/2016. The EMBRIC  
55  
56  
57 258 configurator service received funding from the European Union's Horizon 2020  
58  
59  
60  
61  
62  
63  
64  
65

259 research and innovation programme under grant agreement No 654008. The authors  
1  
2 260 thank Pedro Guerreiro for experimental sampling.  
3

4  
5 261

## 6 7 262 **References**

- 8  
9  
10 263 1. Parrish RH, Serra R and Grant WS. The monotypic sardines, *Sardina* and  
11  
12 264 *Sardinops* - Their taxonomy, distribution, stock structure, and zoogeography.  
13  
14 265 Can J Fish Aquat Sci. 1989;46 11:2019-36. doi:10.1139/f89-251.  
16  
17 266 2. Silva A. Morphometric variation among sardine (*Sardina pilchardus*)  
18  
19 267 populations from the northeastern Atlantic and the western Mediterranean.  
20  
21 268 ICES J Mar Sci. 2003;60 6:1352-60. doi:10.1016/S1054-3139(03)00141-3.  
23  
24 269 3. Lavoue S, Miya M, Saitoh K, Ishiguro NB and Nishida M. Phylogenetic  
25  
26 270 relationships among anchovies, sardines, herrings and their relatives  
27  
28 271 (*Clupeiformes*), inferred from whole mitogenome sequences. Mol Phylogenet  
29  
30 272 Evol. 2007;43 3:1096-105. doi:10.1016/j.ympev.2006.09.018.  
31  
32 273 4. Santos AMP, Borges MDF and Groom S. Sardine and horse mackerel  
33  
34 274 recruitment and upwelling off Portugal. ICES J Mar Sci. 2001;58 3:589-96.  
35  
36 275 doi:10.1006/jmsc.2001.1060.  
37  
38 276 5. Checkley Jr. DM, Asch RG and Rykaczewski RR. Climate, Anchovy, and  
39  
40 277 Sardine. Ann Rev Mar Sci. 2017;9 1:469-93. doi:10.1146/annurev-marine-  
41  
42 278 122414-033819.  
43  
44 279 6. ICES. *Report of the Working Group on Southern Horse Mackerel, Anchovy*  
45  
46 280 *and Sardine (WGHANSA), 24–29 June 2017, Bilbao, Spain. CM*  
47  
48 281 *2017/ACOM:17, 640 p.* 2017.  
49  
50 282 7. Atarhouch T, Ruber L, Gonzalez EG, Albert EM, Rami M, Dakkak A, et al.  
51  
52 283 Signature of an early genetic bottleneck in a population of Moroccan sardines  
53  
54  
55  
56  
57  
58  
59  
60  
61  
62  
63  
64  
65

- 284 (*Sardina pilchardus*). Mol Phylogenet Evol. 2006;39 2:373-83.  
1  
2 285 doi:10.1016/j.ympev.2005.08.003.  
3  
4  
5 286 8. Santos MB, Gonzalez-Quiros R, Riveiro I, Cabanas JM, Porteiro C and Pierce  
6  
7 287 GJ. Cycles, trends, and residual variation in the Iberian sardine (*Sardina*  
8  
9 288 *pilchardus*) recruitment series and their relationship with the environment.  
10  
11  
12 289 ICES J Mar Sci. 2012;69 5:739-50. doi:10.1093/icesjms/fsr186.  
13  
14 290 9. Leitao F, Alms V and Erzini K. A multi-model approach to evaluate the role of  
15  
16  
17 291 environmental variability and fishing pressure in sardine fisheries. J Mar Syst.  
18  
19 292 2014;139:128-38. doi:10.1016/j.jmarsys.2014.05.013.  
20  
21  
22 293 10. Tinti F, Di Nunno C, Guarniero I, Talenti M, Tommasini S, Fabbri E, et al.  
23  
24 294 Mitochondrial DNA sequence variation suggests the lack of genetic  
25  
26 295 heterogeneity in the Adriatic and Ionian stocks of *Sardina pilchardus*. Mar  
27  
28  
29 296 Biotechnol (NY). 2002;4 2:163-72. doi:10.1007/s10126-002-0003-3.  
30  
31 297 11. Jemaa S, Bacha M, Khalaf G, Dessailly D, Rabhi K and Amara R. What can  
32  
33  
34 298 otolith shape analysis tell us about population structure of the European  
35  
36 299 sardine, *Sardina pilchardus*, from Atlantic and Mediterranean waters? J Sea  
37  
38  
39 300 Res. 2015;96:11-7. doi:10.1016/j.seares.2014.11.002.  
40  
41 301 12. Boehm JT, Waldman J, Robinson JD and Hickerson MJ. Population genomics  
42  
43 302 reveals seahorses (*Hippocampus erectus*) of the western mid-Atlantic coast to  
44  
45  
46 303 be residents rather than vagrants. PLOS ONE. 2015;10 1:e0116219.  
47  
48 304 doi:10.1371/journal.pone.0116219.  
49  
50  
51 305 13. Hendricks S, Anderson EC, Antao T, Bernatchez L, Forester BR, Garner B, et  
52  
53 306 al. Recent advances in conservation and population genomics data analysis.  
54  
55  
56 307 Evolutionary Applications. 2018;11 8:1197-211. doi:10.1111/eva.12659.  
57  
58  
59  
60  
61  
62  
63  
64  
65



- 308 14. Marcalo A, Guerreiro PM, Bentes L, Rangel M, Monteiro P, Oliveira F, et al.  
1  
2 309 Effects of different slipping methods on the mortality of sardine, *Sardina*  
3  
4  
5 310 *pilchardus*, after purse-seine capture off the Portuguese Southern coast  
6  
7 311 (Algarve). PLoS One. 2018;13 5:e0195433.  
8  
9  
10 312 doi:10.1371/journal.pone.0195433.  
11  
12 313 15. UC Davis Bioinformatics Core [https://github.com/ucdavis-  
15 314 bioinformatics/proc10xG](https://github.com/ucdavis-<br/>13<br/>14 bioinformatics/proc10xG). Accessed 9/24/2018 2018.  
16  
17 315 16. Marçais G and Kingsford C. A fast, lock-free approach for efficient parallel  
18  
19 316 counting of occurrences of k-mers. Bioinformatics. 2011;27 6:764-70.  
20  
21  
22 317 doi:10.1093/bioinformatics/btr011.  
23  
24 318 17. Vurture GW, Sedlazeck FJ, Nattestad M, Underwood CJ, Fang H, Gurtowski  
25  
26 319 J, et al. GenomeScope: fast reference-free genome profiling from short reads.  
27  
28  
29 320 Bioinformatics. 2017;33 14:2202-4. doi:10.1093/bioinformatics/btx153.  
30  
31  
32 321 18. Weisenfeld NI, Kumar V, Shah P, Church DM and Jaffe DB. Direct  
33  
34 322 determination of diploid genome sequences. Genome Res. 2017;27 5:757-67.  
35  
36 323 doi:10.1101/gr.214874.116.  
37  
38  
39 324 19. Warren RL. RAILS and Cobbler: Scaffolding and automated finishing of draft  
40  
41 325 genomes using long DNA sequences. J Open Source Soft. 2016;1 7:116.  
42  
43  
44 326 doi:10.21105/joss.00116.  
45  
46 327 20. Waterhouse RM, Seppey M, Simao FA, Manni M, Ioannidis P, Klioutchnikov  
47  
48 328 G, et al. BUSCO applications from quality assessments to gene prediction  
49  
50  
51 329 and phylogenomics. Mol Biol Evol. 2017;35 3:543-8.  
52  
53  
54 330 doi:10.1093/molbev/msx319.  
55  
56 331 21. EMBRIC Configurator Service. <http://www.embric.eu/node/1371>. Accessed  
57  
58 332 9/24/2018.  
59  
60  
61  
62  
63  
64  
65

- 333 22. Smit A and Hubley R: RepeatModeler Open-1.0. <http://www.repeatmasker.org>  
1  
2 334 (2008). Accessed 9/24/2018.  
3
- 4 335 23. Hubley R, Finn RD, Clements J, Eddy SR, Jones TA, Bao W, et al. The Dfam  
5 database of repetitive DNA families. *Nucleic Acids Res.* 2016;44 D1:D81-9.  
6  
7 336 doi:10.1093/nar/gkv1272.  
8  
9 337  
10
- 11 338 24. Bao W, Kojima KK and Kohany O. Repbase Update, a database of repetitive  
12 elements in eukaryotic genomes. *Mob DNA.* 2015;6 1:11.  
13  
14 339 doi:10.1186/s13100-015-0041-9.  
15  
16 340  
17
- 18 341 25. Smit A, Hubley R and Green P. 2013–2015. RepeatMasker Open-4.0. 2013.  
19  
20 342 26. Holt C and Yandell M. MAKER2: an annotation pipeline and genome-  
21 database management tool for second-generation genome projects. *BMC*  
22 343 *Bioinformatics.* 2011;12 1:491. doi:10.1186/1471-2105-12-491.  
23  
24 344  
25
- 26 345 27. Korf I. Gene finding in novel genomes. *BMC Bioinformatics.* 2004;5 1:59.  
27  
28 346 doi:10.1186/1471-2105-5-59.  
29  
30 347 28. Keller O, Kollmar M, Stanke M and Waack S. A novel hybrid gene prediction  
31 method employing protein multiple sequence alignments. *Bioinformatics.*  
32 348 2011;27 6:757-63. doi:10.1093/bioinformatics/btr010.  
33  
34 349  
35
- 36 350 29. Lomsadze A, Burns PD and Borodovsky M. Integration of mapped RNA-Seq  
37 reads into automatic training of eukaryotic gene finding algorithm. *Nucleic*  
38 351 *Acids Res.* 2014;42 15:e119. doi:10.1093/nar/gku557.  
39  
40 352  
41
- 42 353 30. Jones P, Binns D, Chang HY, Fraser M, Li W, McAnulla C, et al. InterProScan  
43 354 5: genome-scale protein function classification. *Bioinformatics.* 2014;30  
44  
45 355 9:1236-40. doi:10.1093/bioinformatics/btu031.  
46  
47  
48  
49  
50  
51  
52  
53  
54  
55  
56  
57  
58  
59  
60  
61  
62  
63  
64  
65

- 356 31. Altschul SF, Gish W, Miller W, Myers EW and Lipman DJ. Basic local  
1 alignment search tool. *J Mol Biol.* 1990;215 3:403-10. doi:10.1016/S0022-  
2 357 2836(05)80360-2.  
3  
4 358  
5  
6  
7 359 32. Apweiler R, Bairoch A, Wu CH, Barker WC, Boeckmann B, Ferro S, et al. m.  
8  
9  
10 360 *Nucleic Acids Res.* 2004;32 Database issue:D115-9. doi:10.1093/nar/gkh131.  
11  
12 361 33. Finn RD, Attwood TK, Babbitt PC, Bateman A, Bork P, Bridge AJ, et al.  
13  
14 362 *InterPro in 2017—beyond protein family and domain annotations. Nucleic*  
15  
16 363 *Acids Res.* 2016;45 D1:D190. doi:10.1093/nar/gkw1107.  
17  
18  
19 364 34. Sardine Genome Annotation Portal.  
20  
21  
22 365 <http://bioinformatics.psb.ugent.be/orcae/overview/Spil>. Accessed 9/24/2018.  
23  
24 366 35. Sterck L, Billiau K, Abeel T, Rouze P and Van de Peer Y. ORCAE: online  
25  
26 367 resource for community annotation of eukaryotes. *Nat Methods.* 2012;9  
27  
28 368 11:1041. doi:10.1038/nmeth.2242.  
29  
30  
31 369 36. Zheng GX, Lau BT, Schnall-Levin M, Jarosz M, Bell JM, Hindson CM, et al.  
32  
33 370 *Haplotyping germline and cancer genomes with high-throughput linked-read*  
34  
35 371 *sequencing. Nat Biotechnol.* 2016;34 3:303-11. doi:10.1038/nbt.3432.  
36  
37  
38 372 37. Krueger F: "Trim galore" A wrapper tool around Cutadapt and FastQC to  
39  
40 373 consistently apply quality and adapter trimming to FastQ files.  
41  
42 374 [http://www.bioinformatics.babraham.ac.uk/projects/trim\\_galore/](http://www.bioinformatics.babraham.ac.uk/projects/trim_galore/) (2015).  
43  
44 375 Accessed 9/24/2018.  
45  
46  
47 376 38. Martin M. Cutadapt removes adapter sequences from high-throughput  
48  
49 377 *sequencing reads. EMBnet journal.* 2011;17 1:10-2. doi:10.14806/ej.17.1.200.  
50  
51  
52 378 39. Andrews S: *FastQC: a quality control tool for high throughput sequence data.*  
53  
54 379 <http://www.bioinformatics.babraham.ac.uk/projects/fastqc/> (2010). Accessed  
55  
56 380 9/24/2018.  
57  
58  
59  
60  
61  
62  
63  
64  
65

1  
2  
3  
4  
5  
6  
7  
8  
9  
10  
11  
12  
13  
14  
15  
16  
17  
18  
19  
20  
21  
22  
23  
24  
25  
26  
27  
28  
29  
30  
31  
32  
33  
34  
35  
36  
37  
38  
39  
40  
41  
42  
43  
44  
45  
46  
47  
48  
49  
50  
51  
52  
53  
54  
55  
56  
57  
58  
59  
60  
61  
62  
63  
64  
65

381 40. Haas BJ, Papanicolaou A, Yassour M, Grabherr M, Blood PD, Bowden J, et  
382 al. De novo transcript sequence reconstruction from RNA-seq using the Trinity  
383 platform for reference generation and analysis. Nat Protoc. 2013;8 8:1494-  
384 512. doi:10.1038/nprot.2013.084.

385 41. INCD - National Distributed Computing Infrastructure is a digital infrastructure  
386 supporting research, approved within the framework of the strategic research  
387 infrastructures of the Science and Technology Foundation (FCT). .  
388 <http://www.incd.pt/?p=sobre-nos&lang=en>. Accessed 9/24/2018.

389 42. Smith-Unna R, Boursnell C, Patro R, Hibberd JM and Kelly S. TransRate:  
390 reference-free quality assessment of de novo transcriptome assemblies.  
391 Genome Res. 2016;26 8:1134-44. doi:10.1101/gr.196469.115.

392 43. Bryant DM, Johnson K, DiTommaso T, Tickle T, Couger MB, Payzin-Dogru D,  
393 et al. A Tissue-Mapped Axolotl De Novo Transcriptome Enables Identification  
394 of Limb Regeneration Factors. Cell Rep. 2017;18 3:762-76.  
395 doi:10.1016/j.celrep.2016.12.063.

396 44. TransDecoder identifies candidate coding regions within transcript sequences.  
397 <http://github.com/TransDecoder>. Accessed 9/24/2018.

398 45. Finn RD, Clements J and Eddy SR. HMMER web server: interactive  
399 sequence similarity searching. Nucleic Acids Res. 2011;39 Web Server  
400 issue:W29-37. doi:10.1093/nar/gkr367.

403 **Tables**

404  
405 Table 1. List of descriptive metrics estimated by Supernova on the input sequence  
406 data for the *de novo* genome assembly.

|                                         |           |
|-----------------------------------------|-----------|
| Number of paired reads used             | 607.36 M  |
| Mean read length after trimming         | 138.50 bp |
| Median insert size                      | 345 bp    |
| Weighted mean DNA molecule size         | 46.41 Kb  |
| N50 reads per barcode                   | 612       |
| Raw coverage                            | 78.35 X   |
| Effective read coverage                 | 52.91 X   |
| Mean distance between heterozygous SNPs | 197 bp    |

407

408

409

1  
2  
3  
4  
5  
6  
7  
8  
9  
10  
11  
12  
13  
14  
15  
16  
17  
18  
19  
20  
21  
22  
23  
24  
25  
26  
27  
28  
29  
30  
31  
32  
33  
34  
35  
36  
37  
38  
39  
40  
41  
42  
43  
44  
45  
46  
47  
48  
49  
50  
51  
52  
53  
54  
55  
56  
57  
58  
59  
60  
61  
62  
63  
64  
65

410 Table 2. Descriptive metrics of genome assemblies, the two haploids genomes  
 411 Spil\_haploid1 (ERZ724592) and Spil\_haploid2 (ERZ724593) assembled/scaffolded  
 412 solely by Supernova and the consensus genome Spil (GCA\_900492735.1)  
 413 assembled/scaffolded by Supernova plus Rails/Cobbler.

| Scaffolds      | Spil_haploid1    | Spil_haploid2    | Spil             |
|----------------|------------------|------------------|------------------|
| Largest        | 6 835 195 bp     | 6 849 541 bp     | 6 843 175 bp     |
| Number         |                  |                  |                  |
| >=100Kb        | 874              | 872              | 890              |
| >= 10Kb        | 8 301            | 8 298            | 8 760            |
| >= 1Kb (total) | 117 698          | 117 698          | 117 259          |
| L50 / N50      |                  |                  |                  |
| >=100Kb        | 135 / 905 971 bp | 134 / 925 166 bp | 137 / 899 108 bp |
| >= 10Kb        | 242 / 572 700 bp | 242 / 568 166 bp | 254 / 552 199 bp |
| >= 1Kb         | 859 / 102 905 bp | 860 / 102 672 bp | 903 / 96 617 bp  |
| Assembly size  |                  |                  |                  |
| >=100Kb        | 469 371 101 bp   | 468 838 424 bp   | 473 549 829 bp   |
| >= 10Kb        | 622 164 859 bp   | 621 688 061 bp   | 636 490 596 bp   |
| >= 1Kb         | 935 547 786 bp   | 935 081 460 bp   | 949 618 126 bp   |

414

415

416

417 Table 3 – Summary statistics of generated transcriptome data for the eleven tissues.

| Tissue                              | Paired raw reads | Contigs | CDS deduced | SwissProt annotated | Accession number |
|-------------------------------------|------------------|---------|-------------|---------------------|------------------|
| Gill/Branchial Arch                 | 29 783 994       | 62 526  | 29.3%       | 38.6%               | ERS2629269       |
| Liver                               | 33 479 471       | 53 104  | 29.7%       | 40.1%               | ERS2629273       |
| Spleen                              | 25 634 530       | 66 419  | 31.6%       | 40.4%               | ERS2629276       |
| Ovary                               | 22 241 327       | 42 521  | 38.1%       | 42.5%               | ERS2629270       |
| Midgut                              | 28 016 117       | 75 782  | 31.0%       | 39.5%               | ERS2629274       |
| White Muscle                        | 24 409 160       | 49 266  | 35.4%       | 44.8%               | ERS2629277       |
| Red Muscle                          | 30 653 774       | 55 873  | 30.3%       | 42.1%               | ERS2629275       |
| Kidney                              | 27 861 879       | 59 495  | 30.8%       | 37.3%               | ERS2629272       |
| Head Kidney                         | 25 280 960       | 65 888  | 32.2%       | 38.4%               | ERS2629271       |
| Brain/Pituitary                     | 24 467 352       | 75 620  | 24.5%       | 37.1%               | ERS2629267       |
| Caudal Fin<br>(Skin/Cartilage/Bone) | 26 342 097       | 64 832  | 23.9%       | 38.0%               | ERS2629268       |
| All Tissues                         | 298 170 661      | 170 478 | 15.9%       | 25.5%               | ERS2629362       |

418

419

## Figure legends

Figure 1. European sardine (photo credit ©[Citron](#) / [CC BY-SA 3.0](#))

Figure 2. 23-mer depth distribution to estimate genome size (907Mb), repeat content (40.7%) and heterozygosity level (1.43%). Two kmer coverage peaks are observed at 28X and 50X.

## Additional files

**Additional file 1.** Heterozygous SNPs identified in the phased haploid blocks listed in a VCF file format.

**Additional file 2.** Annotation of all tissues transcriptome assembly in a tabular format.



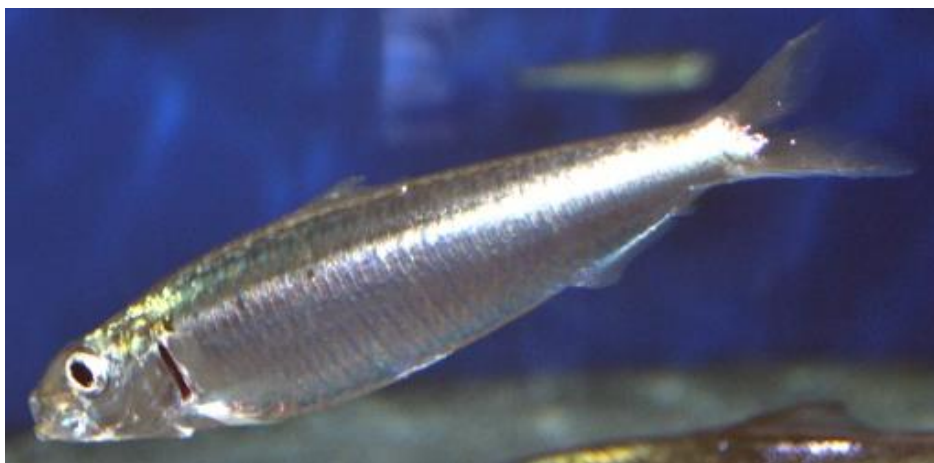

Figure 1.

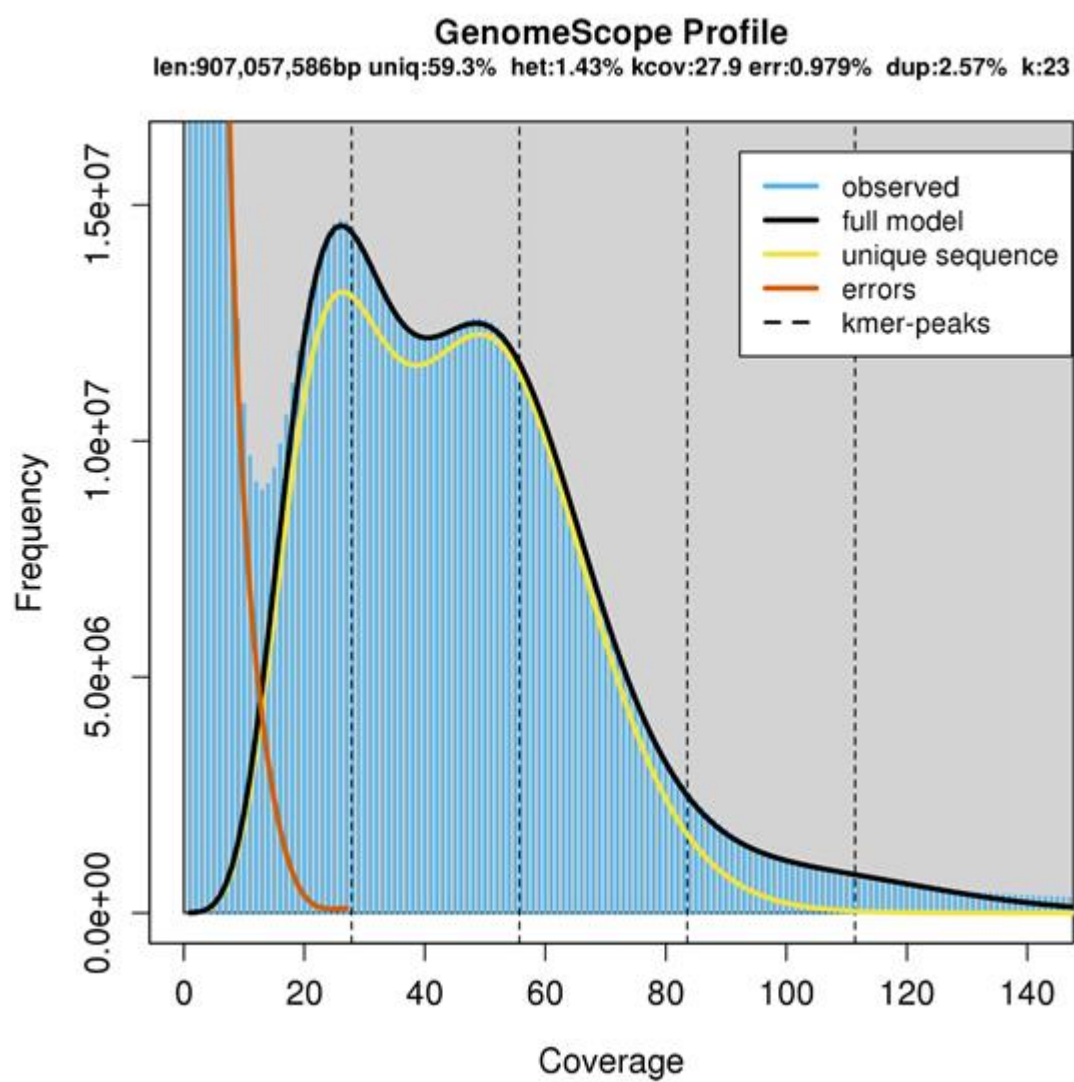

Figure 2.

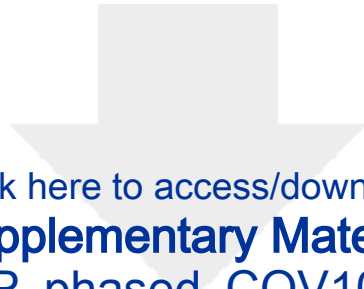

Click here to access/download  
**Supplementary Material**  
Spil\_SNP\_phased\_COV10\_nbc.vcf

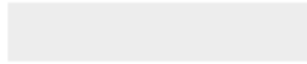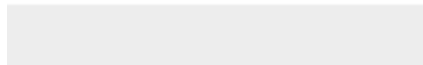



Click here to access/download  
**Supplementary Material**  
additional\_file\_2.txt

## Cover Letter

September 24, 2018

Dear Editor,

We would like to submit the manuscript entitled "**A haplotype-resolved draft genome of the European sardine (*Sardina Pilchardus*)**" by Louro *et al.* for publication in GigaScience as a Data Note article. In the manuscript we report the first assembled and annotated draft genome of the European sardine. We report three de-novo assemblies, a consensus draft genome (size 950Mbp; N50 length 97 Kb) and two haploid-resolved draft genomes (size 935 Mbp; N50 length 103 Kb), made possible by the use 10X Genomics linked-reads technology. Phased sequencing also allowed the variant calling between phased alleles resulting in more than 2.3 million SNPs with heterozygous loci identified. The transcriptomes of eleven tissues were also de-novo assembled and used to aid the functional annotation of the genome resulting in 29,408 genes predicted.

This resource will be important to foster development of omics approaches to resource conservation and fisheries management a species with cultural and economic value. Consequently, the sequences have already been made available to the public. We therefore expect that you will consider the manuscript suitable for publication in GigaScience.

All authors have approved the manuscript for submission and state that the content of the manuscript has not been published, or submitted for publication elsewhere. The authors also declare that no potential competing interests or any issues relating to journal policies exists.

Yours sincerely,

Adelino Canário
